# Supplementary material for: Fructose Stimulated Colonic Arginine and Proline Metabolism Dysbiosis, Altered Microbiota and Aggravated Intestinal Barrier Dysfunction in DSS-Induced Colitis Rats
Source: MDPI journal article supplement (doi:10.3390/nu15030782), 2023-02-03
Supplement: s1 [file s1]

## A Supplementary materials

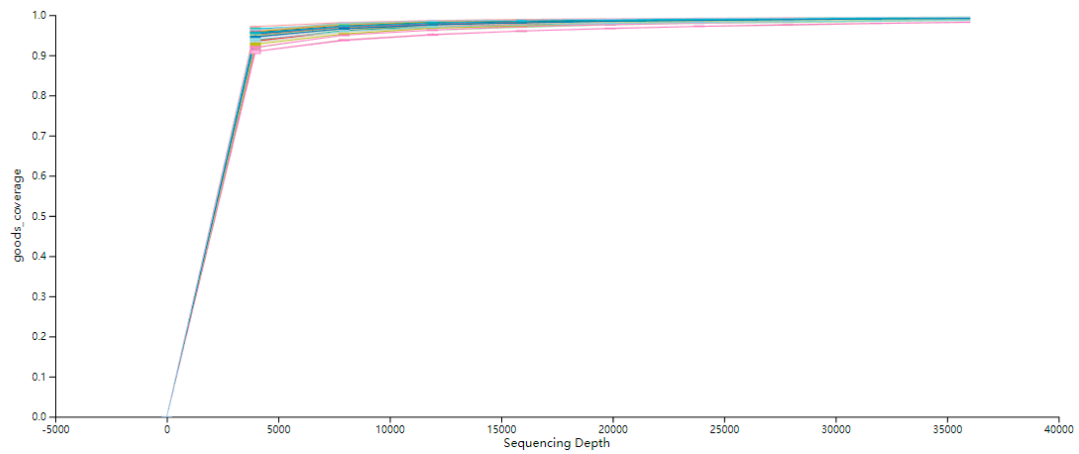

Figure.S1 The rarefaction curve and Shannon index curve

A

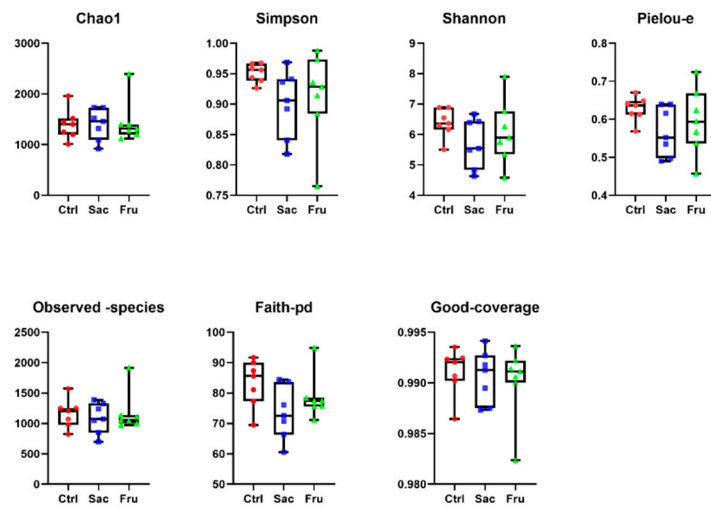

B

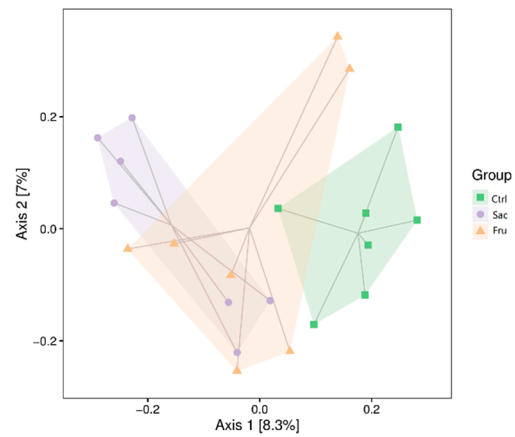

Figure.S2 Gut microbiota divergence of rats in addition of sucrose and fructose under non-DSS treatment conditions (A) Overall structure of gut bacteria; (B) PCoA score plot of colon contents base on jaccards.

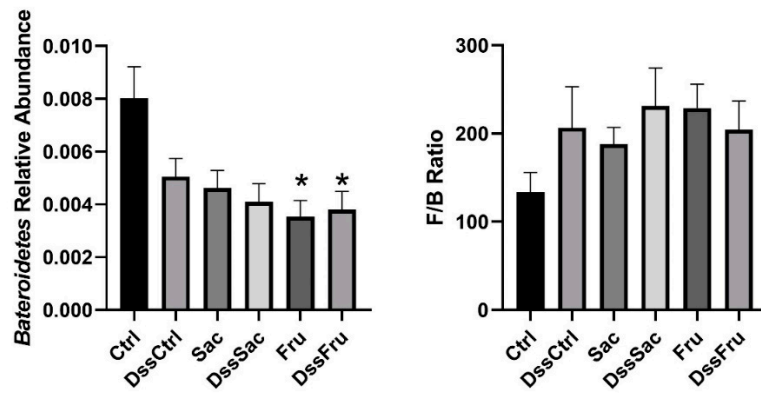

Figure S3 The taxonomic abundance of *Bacteroidetes* and the ratio of *Firmicutes*/*Bacteroidetes*, \* $P < 0.05$ ,  $n=7$ .

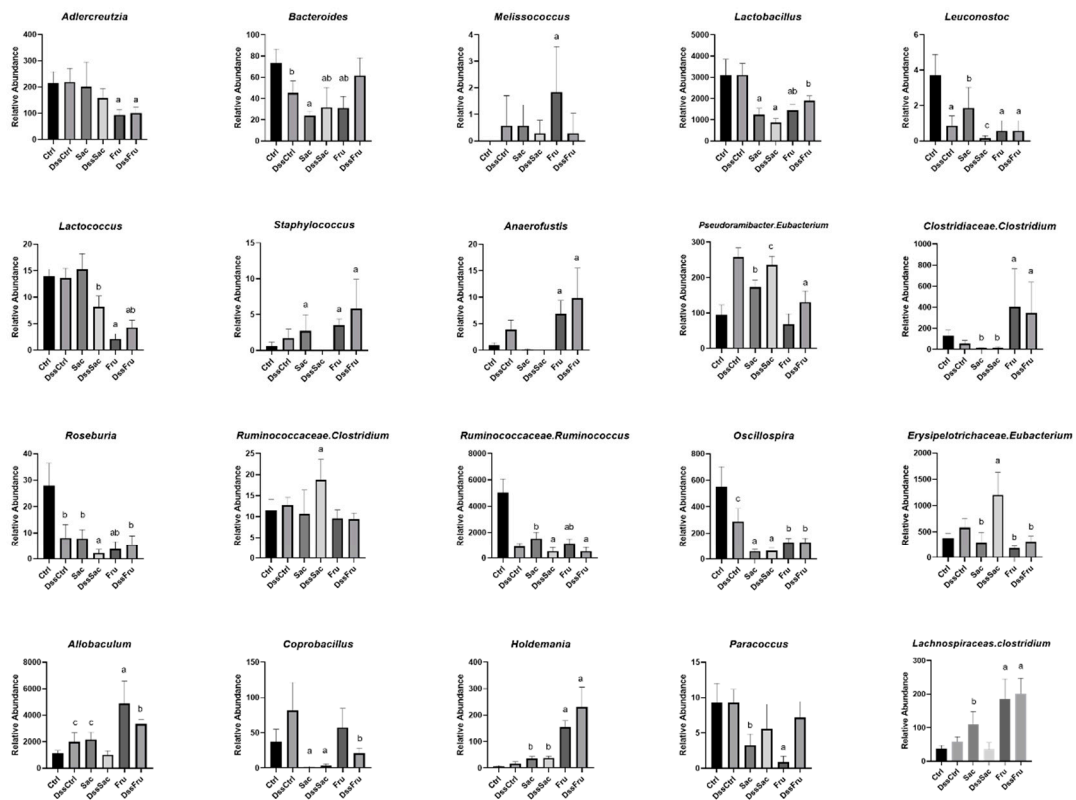

Figure.S4 Relative abundance of OTUs of which LDA score  $\geq 2$ , different letters present significant differences,  $P < 0.05$ ,  $n=7$

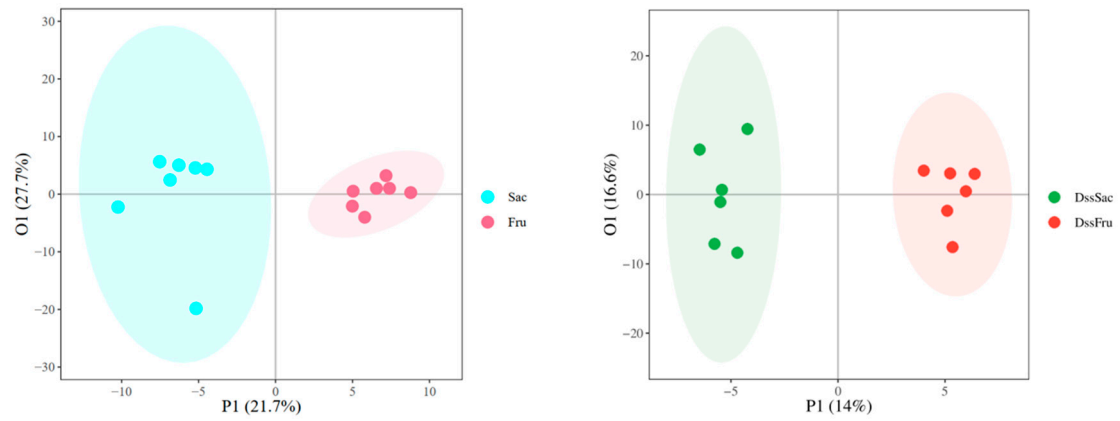

Figure.S5 Scores plots of OPLS-DA of different groups

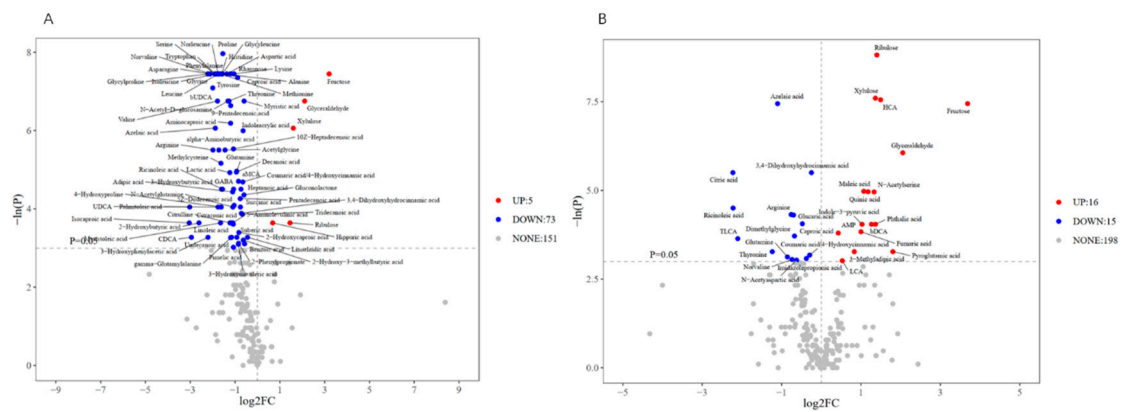

Figure.S6 Volcano plots of colonic metabolites of rats showing the significantly changed metabolites in groups, A. Sac vs Fru, B. DssSac vs DssFru

Table S1. The feed formula

|                               | Con   |        | Sac   |        | MFD   |        |
|-------------------------------|-------|--------|-------|--------|-------|--------|
|                               | g%    | kcal%  | g%    | kcal%  | g%    | kcal%  |
| protein                       | 19.24 | 19.24  | 19.24 | 19.24  | 19.24 | 19.24  |
| Carbohydrates                 | 71.09 | 66.35  | 71.09 | 66.35  | 71.09 | 66.35  |
| fat                           | 4.27  | 14.41  | 4.27  | 14.41  | 4.27  | 14.41  |
|                               |       |        |       |        |       |        |
| casein                        | 18.96 | 75.84  | 18.96 | 75.84  | 18.96 | 75.84  |
| l-cystine                     | 0.28  | 1.12   | 0.28  | 1.12   | 0.28  | 1.12   |
| Corn starch                   | 66.35 | 265.4  | 53.6  | 214.4  | 53.6  | 214.4  |
| fructose                      | 0     | 0      | 0     | 0      | 12.75 | 51     |
| sucrose                       | 0     | 0      | 12.75 | 51     | 0     | 0      |
| cellulose                     | 4.74  | 0      | 0     | 0      | 4.74  | 0      |
| Soybean oil                   | 2.37  | 21.33  | 2.37  | 21.33  | 2.37  | 21.33  |
| lard                          | 1.9   | 17.1   | 1.9   | 17.1   | 1.9   | 17.1   |
| Multiple mine                 | 0.95  | 0      | 0.95  | 0      | 0.95  | 0      |
| Calcium hydrogen<br>phosphate | 1.23  | 0      | 1.23  | 0      | 1.23  | 0      |
| Calcium carbonate             | 0.52  | 0      | 0.52  | 0      | 0.52  | 0      |
| Potassium citrate             | 1.56  | 0      | 1.56  | 0      | 1.56  | 0      |
| multidimensional              | 0.95  | 0      | 0.95  | 0      | 0.95  | 0      |
| Choline bitartrate            | 0.19  | 0      | 0.19  | 0      | 0.19  | 0      |
| In total                      | 100   | 380.79 | 100   | 380.79 | 100   | 380.79 |
